# Supplementary material for: Beneath the Bark: Assessing Woody Stem Water and Carbon Fluxes and Its Prevalence Across Climates and the Woody Plant Phylogeny
Source: Frontiers journal article supplement (doi:10.3389/ffgc.2021.675299), 2021-07-27
Supplement: Table_1.DOCX [file Table_1.DOCX]

**Table S1.** List of species that exhibit evidence of bark photosynthesis (Bark PS), bark conductance (Bark g), bark photosynthesis and bark conductance (Bark PS + g), and bark water uptake (Bark Water Uptake). Also shown are corresponding citations and GPS coordinates of observation, when available. Observations of Bark PS that only show evidence of CO2 reassimilation (and not net CO2 uptake) are indicated with an asterisk (*).

| **Citation** | **Species** | **Latitude** | **Longitude** | **Evidence** |
| --- | --- | --- | --- | --- |
| Adams et al. (1967) | *Parkinsonia florida* | 33.64507 | -116.37531 | Bark PS |
| Alessio et al. (2005) | *Prunus persica* | 41.91024 | 12.39591 | Bark PS* + g |
| Anderson and Szarek (1981) | *Xanthisma gracile* | 34.33870 | -111.39533 | Bark PS |
| Armstrong and Armstrong (2005) | *Alnus glutinosa* | 53.82555 | -0.69581 | Bark PS |
| Aschan et al. (2001) | *Populus tremula* | 51.42236 | 6.80869 | Bark PS* |
| Ávila-Lovera and Tezara (2018) | *Parkinsonia praecox* | 11.02500 | -64.29056 | Bark PS + g |
| Ávila-Lovera et al. (2017) | *Ambrosia salsola* | 33.68472 | -116.36889 | Bark PS + g |
|  | *Ambrosia salsola* | 34.03667 | -116.62334 | Bark PS + g |
|  | *Ambrosia salsola* | 33.68472 | -116.36889 | Bark PS + g |
|  | *Ambrosia salsola* | 34.03667 | -116.62334 | Bark PS + g |
|  | *Bebbia juncea* | 33.68472 | -116.36889 | Bark PS + g |
|  | *Bebbia juncea* | 33.68472 | -116.36889 | Bark PS + g |
|  | *Ephedra aspera* | 33.68472 | -116.36889 | Bark PS + g |
|  | *Ephedra aspera* | 33.68472 | -116.36889 | Bark PS + g |
|  | *Ephedra californica* | 34.03667 | -116.62334 | Bark PS + g |
|  | *Ephedra californica* | 34.03667 | -116.62334 | Bark PS + g |
|  | *Ephedra nevadensis* | 33.97055 | -117.32222 | Bark PS + g |
|  | *Ephedra nevadensis* | 33.97055 | -117.32222 | Bark PS + g |
|  | *Euphorbia xanti* | 33.97055 | -117.32222 | Bark PS + g |
|  | *Euphorbia xanti* | 33.97055 | -117.32222 | Bark PS + g |
|  | *Hoffmannseggia microphylla* | 33.68472 | -116.36889 | Bark PS + g |
|  | *Hoffmannseggia microphylla* | 33.68472 | -116.36889 | Bark PS + g |
|  | *Justicia californica* | 33.97055 | -117.32222 | Bark PS + g |
|  | *Justicia californica* | 33.68472 | -116.36889 | Bark PS + g |
|  | *Justicia californica* | 33.97055 | -117.32222 | Bark PS + g |
|  | *Justicia californica* | 33.68472 | -116.36889 | Bark PS + g |
|  | *Parkinsonia florida* | 33.97055 | -117.32222 | Bark PS + g |
|  | *Parkinsonia florida* | 33.68472 | -116.36889 | Bark PS + g |
|  | *Parkinsonia florida* | 33.97055 | -117.32222 | Bark PS + g |
|  | *Parkinsonia florida* | 33.68472 | -116.36889 | Bark PS + g |
|  | *Scutellaria mexicana* | 34.03667 | -116.62334 | Bark PS + g |
|  | *Scutellaria mexicana* | 34.03667 | -116.62334 | Bark PS + g |
|  | *Thamnosma montana* | 34.03667 | -116.62334 | Bark PS + g |
|  | *Thamnosma montana* | 34.03667 | -116.62334 | Bark PS + g |
| Ávila-Lovera et al. (2019) | *Ambrosia salsola* | 34.06403 | -116.05453 | Bark PS + g |
|  | *Bebbia juncea* | 34.06403 | -116.05453 | Bark PS + g |
|  | *Eriogonum inflatum* | 34.06403 | -116.05453 | Bark PS + g |
|  | *Krameria bicolor* | 34.06403 | -116.05453 | Bark PS + g |
|  | *Menodora spinences* | 34.06403 | -116.05453 | Bark PS + g |
|  | *Scutellaria mexicana* | 34.06403 | -116.05453 | Bark PS + g |
|  | *Senna armata* | 34.06403 | -116.05453 | Bark PS + g |
|  | *Stillingia linearifolia* | 34.06403 | -116.05453 | Bark PS + g |
|  | *Thamnosma montana* | 34.06403 | -116.05453 | Bark PS + g |
| Ávila-Lovera et al. (2020) | *Bursera epinnata* | 24.08333 | -110.35000 | Bark PS |
|  | *Bursera microphylla* | 24.08333 | -110.35000 | Bark PS |
|  | *Castela peninsularis* | 24.08333 | -110.35000 | Bark PS |
|  | *Cyrtocarpa edulis* | 24.08333 | -110.35000 | Bark PS |
|  | *Euphorbia lomelii* | 24.08333 | -110.35000 | Bark PS |
|  | *Fouquieria diguetii* | 24.08333 | -110.35000 | Bark PS |
|  | *Jatropha cinerea* | 24.08333 | -110.35000 | Bark PS |
|  | *Jatropha cuneata* | 24.08333 | -110.35000 | Bark PS |
|  | *Krameria paucifolia* | 24.08333 | -110.35000 | Bark PS |
|  | *Olneya tesota* | 24.08333 | -110.35000 | Bark PS |
|  | *Parkinsonia praecox* | 24.08333 | -110.35000 | Bark PS |
|  | *Prosopis articulata* | 24.08333 | -110.35000 | Bark PS |
| Beikircher and Mayr (2013) | *Malus domestica ‘Gala’* | 46.61666 | 10.86667 | Bark g |
|  | *Malus domestica ‘Nicoter cov’* | 46.61666 | 10.86667 | Bark g |
| Berveiller and Damesin (2008) | *Fagus sylvatica* | 48.70000 | 2.16667 | Bark PS* |
| Berveiller et al. (2007) | *Alnus glutinosa* | 48.70000 | 2.16667 | Bark PS* |
|  | *Alnus glutinosa* | 48.70000 | 2.16667 | Bark PS* |
|  | *Betula pendula* | 48.70000 | 2.16667 | Bark PS* |
|  | *Betula pendula* | 48.70000 | 2.16667 | Bark PS* |
|  | *Fraxinus excelsior* | 48.70000 | 2.16667 | Bark PS* |
|  | *Fraxinus excelsior* | 48.70000 | 2.16667 | Bark PS* |
|  | *Ginkgo biloba* | 48.70000 | 2.16667 | Bark PS* |
|  | *Ginkgo biloba* | 48.70000 | 2.16667 | Bark PS* |
|  | *Picea abies* | 48.70000 | 2.16667 | Bark PS* |
|  | *Picea abies* | 48.70000 | 2.16667 | Bark PS* |
|  | *Pinus sylvestris* | 48.70000 | 2.16667 | Bark PS* |
|  | *Pinus sylvestris* | 48.70000 | 2.16667 | Bark PS* |
|  | *Quercus robur* | 48.70000 | 2.16667 | Bark PS* |
|  | *Quercus robur* | 48.70000 | 2.16667 | Bark PS* |
|  | *Tilia cordata* | 48.70000 | 2.16667 | Bark PS* |
|  | *Tilia cordata* | 48.70000 | 2.16667 | Bark PS* |
| Billings and Godfrey (1967) | *Mertensia ciliata* | 41.35379 | -106.34987 | Bark PS |
| Bloemen et al. (2016) | *Populus deltoides x nigra* | 51.02663 | 3.71396 | Bark PS* |
| Bossard and Rejmanek (1992) | *Cytisus scoparius* | 38.53823 | -121.76390 | Bark PS |
| Brayman and Schaedle (1982) | *Populus tremuloides* | 43.04011 | -76.14387 | Bark PS* |
| Burrows and Connor (2020) | *Angophora hispida* | -35.06000 | 147.36000 | Bark PS |
|  | *Corymbia citriodora* | -35.06000 | 147.36000 | Bark PS |
|  | *Corymbia eximia* | -35.06000 | 147.36000 | Bark PS |
|  | *Corymbia ficifolia* | -35.06000 | 147.36000 | Bark PS |
|  | *Corymbia maculata* | -35.06000 | 147.36000 | Bark PS |
|  | *Eucalyptus albens* | -35.06000 | 147.36000 | Bark PS |
|  | *Eucalyptus blakelyi* | -35.06000 | 147.36000 | Bark PS |
|  | *Eucalyptus caesia* | -35.06000 | 147.36000 | Bark PS |
|  | *Eucalyptus camaldulensis* | -35.06000 | 147.36000 | Bark PS |
|  | *Eucalyptus cinerea* | -35.06000 | 147.36000 | Bark PS |
|  | *Eucalyptus cladocalyx* | -35.06000 | 147.36000 | Bark PS |
|  | *Eucalyptus erythrocorys* | -35.06000 | 147.36000 | Bark PS |
|  | *Eucalyptus globulus* | -35.06000 | 147.36000 | Bark PS |
|  | *Eucalyptus kruseana* | -35.06000 | 147.36000 | Bark PS |
|  | *Eucalyptus leucoxylon* | -35.06000 | 147.36000 | Bark PS |
|  | *Eucalyptus macrocarpa* | -35.06000 | 147.36000 | Bark PS |
|  | *Eucalyptus macrorhyncha* | -35.06000 | 147.36000 | Bark PS |
|  | *Eucalyptus melliodora* | -35.06000 | 147.36000 | Bark PS |
|  | *Eucalyptus nicholii* | -35.06000 | 147.36000 | Bark PS |
|  | *Eucalyptus rossii* | -35.06000 | 147.36000 | Bark PS |
|  | *Eucalyptus scoparia* | -35.06000 | 147.36000 | Bark PS |
|  | *Eucalyptus sideroxylon* | -35.06000 | 147.36000 | Bark PS |
|  | *Eucalyptus torquata* | -35.06000 | 147.36000 | Bark PS |
| Cagnola et al. (2012) | *Solanum lycopersicum* | -34.59722 | -58.48529 | Bark PS |
| Cannon (1908) | *Ambrosia dumosa* | 32.21490 | -111.00258 | Bark PS |
|  | *Baccharis emoryi* | 32.21490 | -111.00258 | Bark PS |
|  | *Celtis palida* | 32.21490 | -111.00258 | Bark PS |
|  | *Chloracantha spinosa* | 32.21490 | -111.00258 | Bark PS |
|  | *Condalia spathulaca* | 32.21490 | -111.00258 | Bark PS |
|  | *Ephedra antisyphilitica* | 32.21490 | -111.00258 | Bark PS |
|  | *Fouquieria splendens* | 32.21490 | -111.00258 | Bark PS |
|  | *Koeberlinia spinosa* | 32.21490 | -111.00258 | Bark PS |
|  | *Krameria canescens* | 32.21490 | -111.00258 | Bark PS |
|  | *Larrea tridentata* | 32.21490 | -111.00258 | Bark PS |
|  | *Olneya tesota* | 32.21490 | -111.00258 | Bark PS |
|  | *Parkinsonia aculeata* | 32.21490 | -111.00258 | Bark PS |
|  | *Parkinsonia microphylla* | 32.21490 | -111.00258 | Bark PS |
|  | *Parkinsonia torreyana* | 32.21490 | -111.00258 | Bark PS |
|  | *Prosopis velutina* | 32.21490 | -111.00258 | Bark PS |
|  | *Salix nigra* | 32.21490 | -111.00258 | Bark PS |
|  | *Sambucus nigra* | 32.21490 | -111.00258 | Bark PS |
|  | *Ziziphus parryi* | 32.21490 | -111.00258 | Bark PS |
| Carmichael et al. (2020) | *Taxodium distichum* | 36.13760 | -80.29523 | Bark Water Uptake |
| Cerasoli et al. (2008) | *Eucalyptus globulus* | 38.47500 | -8.45833 | Bark PS* |
| Cernusak and Hutley (2011) | *Eucalyptus miniata* | -12.46614 | 130.83568 | Bark PS |
| Cernusak and Marshall (2000) | *Pinus monticola* | 46.79817 | -116.81479 | Bark PS + g |
| Cernusak et al. (2001) | *Pinus monticola* | 46.79817 | -116.81479 | Bark PS |
|  | *Populus tremuloides* | 46.80833 | -16.99167 | Bark PS |
| Chen et al. (2018) | *Castanopsis hystrix* | 22.68333 | 112.90000 | Bark PS* |
|  | *Eucalyptus citriodora* | 23.18333 | 113.36667 | Bark PS* |
|  | *Eucalyptus grandis × urophylla* | 24.76667 | 109.90000 | Bark PS* |
|  | *Michelia macclurei* | 22.68333 | 112.90000 | Bark PS* |
| Chen et al. (2021) | *Eucalyptus urophylla* | 22.68333 | 112.90000 | Bark PS* |
| Comstock et al. (1988) | *Ambrosia salsola* | 34.95000 | -114.41666 | Bark PS |
|  | *Baccharis brachyphylla* | 34.95000 | -114.41666 | Bark PS |
|  | *Bebbia juncea* | 34.95000 | -114.41666 | Bark PS |
|  | *Gutierrezia sarothrae* | 34.95000 | -114.41666 | Bark PS |
|  | *Porophyllum gracile* | 34.95000 | -114.41666 | Bark PS |
|  | *Senecio flaccidus* | 34.95000 | -114.41666 | Bark PS |
|  | *Sphaeralcea parvifolia* | 34.95000 | -114.41666 | Bark PS |
| Damesin (2003) | *Fagus sylvatica* | 48.83333 | 2.16667 | Bark PS* |
|  | *Fagus sylvatica* | 48.83333 | 2.16667 | Bark PS* |
| De Baerdemaeker et al. (2017) | *Populus nigra* | 51.02663 | 3.71396 | Bark PS* |
| De Roo et al. (2020) | *Populus tremula* | 51.02663 | 3.71396 | Bark PS* |
| De Roo et al. (2020) | *Populus tremula* | 50.96667 | 3.81667 | Bark PS* |
| De Roo et al. (2020) | *Populus tremula* | 51.02663 | 3.71396 | Bark PS* |
| DePuit and Caldwell (1975) | *Artemisia tridentata* | 41.75000 | -111.75000 | Bark PS |
|  | *Gutierrezia sarothrae* | 41.75000 | -111.75000 | Bark PS |
|  | *Gutierrezia sarothrae* | 41.75000 | -111.75000 | Bark PS |
| Dima et al. (2006) | *Arbutus unedo* | 38.28968 | 21.78491 | Bark PS |
|  | *Capparis spinosa* | 38.28968 | 21.78491 | Bark PS |
|  | *Ceratonia siliqua* | 38.28968 | 21.78491 | Bark PS |
|  | *Cercis siliquastrum* | 38.28968 | 21.78491 | Bark PS |
|  | *Cistus creticus* | 38.28968 | 21.78491 | Bark PS |
|  | *Dittrichia viscosa* | 38.28968 | 21.78491 | Bark PS |
|  | *Elaeagnus angustifolia* | 38.28968 | 21.78491 | Bark PS |
|  | *Eucalyptus globulus* | 38.28968 | 21.78491 | Bark PS |
|  | *Euphorbia acanthothamnos* | 37.94720 | 23.81667 | Bark PS |
|  | *Myrtus communis* | 38.28968 | 21.78491 | Bark PS |
|  | *Neriun oleander* | 38.28968 | 21.78491 | Bark PS |
|  | *Olea europaea* | 38.28968 | 21.78491 | Bark PS |
|  | *Phillyrea media* | 38.28968 | 21.78491 | Bark PS |
|  | *Phlomis fructicosa* | 38.28968 | 21.78491 | Bark PS |
|  | *Pistacia lentiscus* | 38.28968 | 21.78491 | Bark PS |
|  | *Plantanus orientalis* | 38.28968 | 21.78491 | Bark PS |
|  | *Pyracantha coccinea* | 38.28968 | 21.78491 | Bark PS |
|  | *Robinia pseudoacacia* | 38.28968 | 21.78491 | Bark PS |
|  | *Sarcopoterium spinosum* | 38.28968 | 21.78491 | Bark PS |
|  | *Vitex angus-castus* | 38.28968 | 21.78491 | Bark PS |
| Earles et al. (2016) | *Sequoia sempervirens* | 38.53144 | -121.76175 | Bark Water Uptake |
| Edwards and Donoghue (2006) | *Pereskia diaz-romeroana* | -18.10113 | -64.45551 | Bark PS |
|  | *Pereskia guamacho* | 11.28126 | -69.69042 | Bark PS |
|  | *Pereskia marcanoi* | 19.08950 | -71.68403 | Bark PS |
|  | *Pereskia portulacifolia* | 18.42655 | -71.68403 | Bark PS |
|  | *Pereskia quisqueyana* | 18.36913 | -68.84258 | Bark PS |
|  | *Pereskia sacharosa* | -18.27388 | -64.15805 | Bark PS |
|  | *Pereskia weberiana* | -16.54096 | -67.39115 | Bark PS |
| Ehlreringer et al. (1987) | *Ambrosia salsola* | 34.95000 | -114.41666 | Bark PS + g |
|  | *Bebbia juncea* | 34.95000 | -114.41666 | Bark PS + g |
|  | *Chrysothamnus paniculatus* | 34.95000 | -114.41666 | Bark PS + g |
|  | *Dyssodia porophylloides* | 34.95000 | -114.41666 | Bark PS + g |
|  | *Gutierrezia microcephala* | 34.95000 | -114.41666 | Bark PS + g |
|  | *Gutierrezia sarothrae* | 34.95000 | -114.41666 | Bark PS + g |
|  | *Lepidium fremontii* | 34.95000 | -114.41666 | Bark PS + g |
|  | *Porophyllum gracile* | 34.95000 | -114.41666 | Bark PS + g |
|  | *Psilostrophe cooperi* | 34.95000 | -114.41666 | Bark PS + g |
|  | *Scutellaria mexicana* | 34.95000 | -114.41666 | Bark PS + g |
|  | *Senecio douglasii* | 34.95000 | -114.41666 | Bark PS + g |
|  | *Sphaeralcea parviflora* | 34.95000 | -114.41666 | Bark PS + g |
|  | *Stephanomeria paucifolia* | 34.95000 | -114.41666 | Bark PS + g |
|  | *Thamnosma montana* | 34.95000 | -114.41666 | Bark PS + g |
| Ehleringer et al. (1992) | *Ambrosia salsola* | 34.95000 | -114.41666 | Bark PS + g |
|  | *Senecio douglasii* | 34.95000 | -114.41666 | Bark PS + g |
| Eyles et al. (2009) | *Eucalyptus globulus* | -42.88106 | 147.32755 | Bark PS* |
| Fan et al. (2018) | *Calligonum mongolicum* | 38.63333 | 101.08333 | Bark PS |
| Filippou et al. (2007) | *Olea europaea* | 37.98167 | 23.70333 | Bark PS |
| Foote and Schaedle (1976) | *Populus tremuloides* | 43.04011 | -76.14387 | Bark PS* |
|  | *Populus tremuloides* | 43.04011 | -76.14387 | Bark PS* |
| Francino et al. (2006) | *Chamaecrista trichopoda* | -20.76106 | -42.87235 | Bark PS |
|  | *Fouquieria columnaris* | 29.73333 | -114.70000 | Bark PS* + g |
|  | *Fouquieria columnaris* | 29.73333 | -114.70000 | Bark PS* + g |
|  | *Pachycormus discolor* | 29.73333 | -114.70000 | Bark PS* + g |
|  | *Pachycormus discolor* | 29.73333 | -114.70000 | Bark PS* + g |
| Gao et al. (2015) | *Eucalyptus grandis x urophylla* | 24.76667 | 109.90000 | Bark PS* |
| Gibson (1981) | *Pachycormus discolor* | 29.70774 | -114.67684 | Bark PS |
| Gibson (1983) | *Adolphia californica* | 30.08009 | -115.67350 | Bark PS |
|  | *Ambrosia salsola* | 30.08009 | -115.67350 | Bark PS |
|  | *Asclepias albicans* | 30.08009 | -115.67350 | Bark PS |
|  | *Asclepias subulata* | 30.08009 | -115.67350 | Bark PS |
|  | *Baccharis sarothroides* | 30.08009 | -115.67350 | Bark PS |
|  | *Bebbia juncea* | 30.08009 | -115.67350 | Bark PS |
|  | *Canotia holacantha* | 30.08009 | -115.67350 | Bark PS |
|  | *Canotia wendii* | 30.08009 | -115.67350 | Bark PS |
|  | *Castela emoryi* | 30.08009 | -115.67350 | Bark PS |
|  | *Castela polyandra* | 30.08009 | -115.67350 | Bark PS |
|  | *Chloracantha spinosa* | 30.08009 | -115.67350 | Bark PS |
|  | *Crocanthemum scoparium* | 30.08009 | -115.67350 | Bark PS |
|  | *Ephedra aspera* | 30.08009 | -115.67350 | Bark PS |
|  | *Ephedra trifurca* | 30.08009 | -115.67350 | Bark PS |
|  | *Galvezia juncea* | 30.08009 | -115.67350 | Bark PS |
|  | *Glossopetalon spinescens* | 30.08009 | -115.67350 | Bark PS |
|  | *Hoffmannseggia microphylla* | 30.08009 | -115.67350 | Bark PS |
|  | *Justicia californica* | 30.08009 | -115.67350 | Bark PS |
|  | *Koeberlinia spinosa* | 30.08009 | -115.67350 | Bark PS |
|  | *Krameria bicolor* | 30.08009 | -115.67350 | Bark PS |
|  | *Menodora spinescens* | 30.08009 | -115.67350 | Bark PS |
|  | *Parkinsonia aculeata* | 30.08009 | -115.67350 | Bark PS |
|  | *Parkinsonia florida* | 30.08009 | -115.67350 | Bark PS |
|  | *Parkinsonia microphylla* | 30.08009 | -115.67350 | Bark PS |
|  | *Parkinsonia praecox* | 30.08009 | -115.67350 | Bark PS |
|  | *Psorothamnus spinosus* | 30.08009 | -115.67350 | Bark PS |
|  | *Russelia equisetiformis* | 30.08009 | -115.67350 | Bark PS |
|  | *Scutellaria mexicana* | 30.08009 | -115.67350 | Bark PS |
|  | *Senna armata* | 30.08009 | -115.67350 | Bark PS |
|  | *Thamnosma montana* | 30.08009 | -115.67350 | Bark PS |
|  | *Ziziphus obtusifolia* | 30.08009 | -115.67350 | Bark PS |
| Girma et al. (2013) | *Boswellia papyrifera* | 12.28333 | 36.00000 | Bark PS |
| Glass and Granet (1978) | *Fagus grandifolia* | 42.44270 | -76.53339 | Bark PS |
| Gómez-Vazquez and Engleman (1984) | *Bursera copallifera* | 18.75484 | -99.12683 | Bark PS |
|  | *Bursera longipes* | 18.75484 | -99.12683 | Bark PS |
| Grašič et al. (2020) | *Corylus avellana* | 45.83390 | 15.22020 | Bark PS |
| Haase et al. (1999) | *Retama sphaerocarpa* | 37.13334 | -2.36667 | Bark PS |
| Henrickson (1969) | *Fouquieria burragei* | 24.27708 | -110.32205 | Bark PS |
|  | *Fouquieria campanulata* | 29.75603 | -114.40990 | Bark PS |
|  | *Fouquieria columnaris* | 24.05756 | -110.36619 | Bark PS |
|  | *Fouquieria diguetii* | 27.44111 | -112.52515 | Bark PS |
|  | *Fouquieria fasciculata* | 20.70678 | -98.86697 | Bark PS |
|  | *Fouquieria formosa* | 18.72990 | -99.12967 | Bark PS |
|  | *Fouquieria leonilae* | 17.93513 | -99.60000 | Bark PS |
|  | *Fouquieria macdougalii* | 29.28709 | -110.95244 | Bark PS |
|  | *Fouquieria ochoterenae* | 17.58619 | -99.09227 | Bark PS |
|  | *Fouquieria purpusii* | 18.72990 | -99.12967 | Bark PS |
|  | *Fouquieria shrevei* | 25.66667 | -103.16666 | Bark PS |
|  | *Fouquieria splendens* | 29.75603 | -114.40990 | Bark PS |
| Hu et al. (2012) | *Gossypium hirsutum* | 45.31667 | 86.05000 | Bark PS |
| Ivanov et al. (2004) | *Ephedra sinica* | 43.20444 | 100.65972 | Bark PS |
| Katz et al. (1989) | *Picea abies* |  |  | Bark Water Uptake |
| Kharouk et al. (1995) | *Abies balsamea* | 56.80234 | -106.09182 | Bark PS |
|  | *Picea mariana* | 56.80234 | -106.09182 | Bark PS |
|  | *Populus tremuloides* | 56.80234 | -106.09182 | Bark PS* |
| Kocurek et al. (2015) | *Clusia multiflora* | 50.06686 | 19.93824 | Bark PS + g |
|  | *Clusia rosea* | 50.06686 | 19.93824 | Bark PS + g |
| Kocurek et al. (2020) | *Clusia minor* | 50.86668 | 20.63516 | Bark PS* |
| Laur and Hacke (2014) | *Picea glauca* |  |  | Bark Water Uptake |
| Levizou and Manetas (2008) | *Prunus cerasus* | 38.28968 | 21.78491 | Bark PS |
| Levy and Jarvis (1998) | *Guiera senegalensis* | 13.23333 | 2.23333 | Bark PS* |
| Li et al. (2014) | *Alhagi sparsifolia* | 37.01667 | 80.71639 | Bark PS |
| Liu (1998) | *Nyssa sylvatica var. biflora* | 29.78333 | -82.25000 | Bark Water Uptake |
|  | *Pinus elliottii* | 29.78333 | -82.25000 | Bark Water Uptake |
|  | *Taxodium ascendens* | 29.78333 | -82.25000 | Bark Water Uptake |
| Liu et al. (2018) | *Salix matsudana* | 40.00291 | 116.24641 | Bark PS* |
| Liu et al. (2019) | *Salix matsudana* | 40.00303 | 116.24757 | Bark PS and Water Uptake |
| Lyshede (1979) | *Genista aetnensis* | 37.75188 | 14.99437 | Bark PS |
|  | *Spartocytisus filipes* | 28.2 | -16.6 | Bark PS |
|  | *Spartocytisus supranubius* | 28.2 | -16.6 | Bark PS |
| Maina and Wang (2015) | *Haloxylon ammodendron* | 44.15 | 84.5 | Bark PS |
| Manetas (2004) | *Arbutus unedo* | 38.28968 | 21.78491 | Bark PS |
|  | *Eucalyptus sp* | 38.28968 | 21.78491 | Bark PS |
|  | *Olea europaea* | 38.28968 | 21.78491 | Bark PS |
|  | *Phillyrea latifolia* | 38.28968 | 21.78491 | Bark PS |
|  | *Pinus halepensis* | 38.28968 | 21.78491 | Bark PS |
|  | *Pistacia lentiscus* | 38.28968 | 21.78491 | Bark PS |
|  | *Platanus orientalis* | 38.28968 | 21.78491 | Bark PS |
|  | *Populus deltoides* | 38.28968 | 21.78491 | Bark PS |
|  | *Prunus cerasus* | 38.28968 | 21.78491 | Bark PS |
|  | *Quercus coccifera* | 38.28968 | 21.78491 | Bark PS |
|  | *Quercus coccifera* | 38.28968 | 21.78491 | Bark PS |
|  | *Syringa vulgaris* | 38.28968 | 21.78491 | Bark PS |
| Manetas and Pfanz (2005) | *Actinidia deliciosa* | 51.46363 | 7.00260 | Bark PS |
|  | *Betula pendula* | 51.46363 | 7.00260 | Bark PS |
|  | *Fagus sylvatica* | 51.46363 | 7.00260 | Bark PS |
|  | *Nothofagus antarctica* | 51.46363 | 7.00260 | Bark PS |
|  | *Olea europaea* | 51.46363 | 7.00260 | Bark PS |
|  | *Prunus cerasus* | 51.46363 | 7.00260 | Bark PS |
|  | *Pyracantha coccinea* | 51.46363 | 7.00260 | Bark PS |
|  | *Quercus ilex* | 51.46363 | 7.00260 | Bark PS |
|  | *Quercus robur* | 51.46363 | 7.00260 | Bark PS |
|  | *Sambucus nigra* | 51.46363 | 7.00260 | Bark PS |
| Mayr et al. (2014) | *Picea abies* | 47.18333 | 11.31667 | Bark Water Uptake |
| Mincke and (2020) | *Populus tremula* | 51.05369 | 3.70649 | Bark PS* |
| Mooney and Strain (1964) | *Fouquieria splendens* | 33.64507 | 116.37531 | Bark PS* |
| Muller (1941) | *Canotia holacantha* | 34.22800 | -113.07050 | Bark PS |
|  | *Castela emoryi* | 34.16466 | -114.30158 | Bark PS |
|  | *Holocantha stewarti* | 30.48396 | -103.96201 | Bark PS |
|  | *Koeberlinia spinosa* | 31.38959 | -109.18531 | Bark PS |
|  | *Thamnosma montana* | 33.16019 | -114.73103 | Bark PS |
| Nedoff et al. (1985) | *Fouquieria splendens* | 33.64720 | -116.37666 | Bark PS |
| Nilsen (1992) | *Spartium junceum* | 37.22839 | -80.42561 | Bark PS |
| Nilsen and Bao (1990) | *Spartium junceum* | 37.22839 | -80.42561 | Bark PS |
| Nilsen and Sharifi (1994) | *Hoffmannseggia microphylla* | 33.81667 | -116.18333 | Bark PS |
|  | *Senna armata* | 34.06667 | -116.03333 | Bark PS |
| Nilsen et al. (1989) | *Psorothamnus spinosus* | 33.73333 | -116.38333 | Bark PS |
|  | *Bursera hindsiana* | 29.66667 | -115.20000 | Bark PS |
|  | *Bursera microphylla* | 29.66667 | -115.20000 | Bark PS |
|  | *Fouquieria columnaris* | 29.66667 | -115.20000 | Bark PS |
| Nilsen et al. (1990) | *Fouquieria splendens* | 29.66667 | -115.20000 | Bark PS |
|  | *Pachycormus discolor* | 29.66667 | -115.20000 | Bark PS |
| Nilsen et al. (1993) | *Cytisus scoparius* | 38.08333 | 123.00000 | Bark PS |
|  | *Spartium junceum* | 37.16667 | -123.00000 | Bark PS |
| Nilsen et al. (1996) | *Hoffmannseggia microphylla* | 33.81667 | -116.18333 | Bark PS |
|  | *Senna armata* | 34.06667 | -116.03333 | Bark PS |
| Olson (2003) | *Dendrosicyos socotrana* | 12.58957 | 53.83063 | Bark PS |
| Osmond et al. (1987) | *Eriogonum inflatum* | 35.58106 | -115.67590 | Bark PS |
| Pearson and Lawrence (1958) | *Populus tremuloides* | 45.40419 | -93.19082 | Bark PS |
| Pfanz (1999) | *Betula pendula* |  |  | Bark PS |
|  | *Fagus sylvatica* |  |  | Bark PS |
|  | *Ilex aquifolium* |  |  | Bark PS |
|  | *Quercus robur* |  |  | Bark PS |
| Pfanz and Aschan (2001) | *Corylus avellana* |  |  | Bark PS |
|  | *Corylus colurna* |  |  | Bark PS |
| Pfanz et al. (2002) | *Acer campestre* |  |  | Bark PS |
|  | *Acer platanoides* |  |  | Bark PS |
|  | *Acer pseudoplatanus* |  |  | Bark PS |
|  | *Aesculus hippocastanum* |  |  | Bark PS |
|  | *Betula pendula* |  |  | Bark PS |
|  | *Fagus sylvatica* |  |  | Bark PS |
|  | *Fraxinus excelsior* |  |  | Bark PS |
|  | *Larix decidua* |  |  | Bark PS |
|  | *Picea abies* |  |  | Bark PS |
|  | *Picea pungens* |  |  | Bark PS |
|  | *Pinus nigra* |  |  | Bark PS |
|  | *Populus tremula* |  |  | Bark PS |
|  | *Quercus robur* |  |  | Bark PS |
|  | *Salix fragilis* |  |  | Bark PS |
|  | *Sambucus nigra* |  |  | Bark PS |
|  | *Sorbus aucuparia* |  |  | Bark PS |
|  | *Tilia platyphyllos* |  |  | Bark PS |
|  | *Ulmus glabra* |  |  | Bark PS |
|  | *Ulmus laevis* |  |  | Bark PS |
| Pilarski (2002) | *Syringa vulgaris* | 50.09626 | 19.87881 | Bark PS |
|  | *Syringa vulgaris* | 50.09626 | 19.87881 | Bark PS |
| Pivovaroff et al. (2016) | *Ephedra californica* | 34.03667 | -116.62344 | Bark PS |
| Pivovaroff et al. (2014) | *Ruscus aculeatus* | 34.06547 | -118.44183 | Bark PS + g |
|  | *Ruscus microglossum* | 34.06547 | -118.44183 | Bark PS + g |
| Ranjan et al. (2012) | *Jatropha curcas* | 26.85629 | 80.94582 | Bark PS* |
|  | *Jatropha curcas* | 26.85629 | 80.94582 | Bark PS* |
| Rentzou and Psaras (2008) | *Euphorbia acanthothamnos* | 38.25000 | 21.73333 | Bark PS |
|  | *Nerium oleander* | 38.25000 | 21.73333 | Bark PS |
|  | *Plantanus orientalis* | 38.25000 | 21.73333 | Bark PS |
| Rosell et al. (2015) | *Acacia dealbata* | -42.40000 | 147.00000 | Bark PS |
|  | *Acacia parvipinnula* | -32.80000 | 150.90000 | Bark PS |
|  | *Alstonia actinophylla* | -12.50000 | 131.10000 | Bark PS |
|  | *Amphipterygium adstringens* | 19.50000 | -105.10000 | Bark PS |
|  | *Angophora costata* | -32.80000 | 150.90000 | Bark PS |
|  | *Antirhea tenuiflora* | -16.10000 | 145.50000 | Bark PS |
|  | *Aotus ericoides* | -42.40000 | 147.00000 | Bark PS |
|  | *Apoplanesia paniculata* | 19.50000 | -105.10000 | Bark PS |
|  | *Ardisia brevipedata* | -16.10000 | 145.50000 | Bark PS |
|  | *Banksia marginata* | -42.40000 | 147.00000 | Bark PS |
|  | *Bossiaea cinerea* | -42.40000 | 147.00000 | Bark PS |
|  | *Bouvardia ternifolia* | 19.30000 | -99.20000 | Bark PS |
|  | *Brachychiton paradoxus* | -12.50000 | 131.10000 | Bark PS |
|  | *Brombya platynema* | -16.10000 | 145.50000 | Bark PS |
|  | *Buchanania obovata* | -12.50000 | 131.10000 | Bark PS |
|  | *Buddleja cordata* | 19.30000 | -99.20000 | Bark PS |
|  | *Bursaria spinosa* | -32.80000 | 150.90000 | Bark PS |
|  | *Bursera cuneata* | 19.30000 | -99.20000 | Bark PS |
|  | *Bursera fagaroides* | 19.30000 | -99.20000 | Bark PS |
|  | *Bursera heteresthes* | 19.50000 | -105.10000 | Bark PS |
|  | *Bursera instabilis* | 19.50000 | -105.10000 | Bark PS |
|  | *Caesalpinia eriostachys* | 19.50000 | -105.10000 | Bark PS |
|  | *Carallia brachiata* | -16.10000 | 145.50000 | Bark PS |
|  | *Cassinia aculeata* | -42.40000 | 147.00000 | Bark PS |
|  | *Cassinia aff. cunninghamii* | -32.80000 | 150.90000 | Bark PS |
|  | *Casuarina torulosa* | -32.80000 | 150.90000 | Bark PS |
|  | *Cochlospermum fraseri* | -12.50000 | 131.10000 | Bark PS |
|  | *Cochlospermum vitifolium* | 19.50000 | -105.10000 | Bark PS |
|  | *Cordia alliodora* | 19.50000 | -105.10000 | Bark PS |
|  | *Corymbia bleeseri* | -12.50000 | 131.10000 | Bark PS |
|  | *Corymbia porrecta* | -12.50000 | 131.10000 | Bark PS |
|  | *Crescentia alata* | 19.50000 | -105.10000 | Bark PS |
|  | *Cryptocarya mackinnoniana* | -16.10000 | 145.50000 | Bark PS |
|  | *Daviesia latifolia* | -42.40000 | 147.00000 | Bark PS |
|  | *Daviesia squarrosa* | -32.80000 | 150.90000 | Bark PS |
|  | *Dodonaea viscosa* | 19.30000 | -99.20000 | Bark PS |
|  | *Doryphora aromatica* | -16.10000 | 145.50000 | Bark PS |
|  | *Dysoxylum papuanum* | -16.10000 | 145.50000 | Bark PS |
|  | *Elaeocarpus grandis* | -16.10000 | 145.50000 | Bark PS |
|  | *Endiandra microneura* | -16.10000 | 145.50000 | Bark PS |
|  | *Epacris impressa* | -42.40000 | 147.00000 | Bark PS |
|  | *Erythrina americana* | 19.30000 | -99.20000 | Bark PS |
|  | *Erythrophleum chlorostachys* | -12.50000 | 131.10000 | Bark PS |
|  | *Esenbeckia nesiotica* | 19.50000 | -105.10000 | Bark PS |
|  | *Eucalyptus miniata* | -12.50000 | 131.10000 | Bark PS |
|  | *Eucalyptus punctata* | -32.80000 | 150.90000 | Bark PS |
|  | *Eucalyptus tenuiramis* | -42.40000 | 147.00000 | Bark PS |
|  | *Eucalyptus tetrodonta* | -12.50000 | 131.10000 | Bark PS |
|  | *Eupomatia laurina* | -16.10000 | 145.50000 | Bark PS |
|  | *Exocarpus cupressiformis* | -42.40000 | 147.00000 | Bark PS |
|  | *Eysenhardtia polystachya* | 19.30000 | -99.20000 | Bark PS |
|  | *Ficus variegata* | -16.10000 | 145.50000 | Bark PS |
|  | *Gillbeea whypallana* | -16.10000 | 145.50000 | Bark PS |
|  | *Gliricidia sepium* | 19.50000 | -105.10000 | Bark PS |
|  | *Gomphandra australiana* | -16.10000 | 145.50000 | Bark PS |
|  | *Grevillea decurrens* | -12.50000 | 131.10000 | Bark PS |
|  | *Grevillea mucronulata* | -32.80000 | 150.90000 | Bark PS |
|  | *Grevillea pteridifolia* | -12.50000 | 131.10000 | Bark PS |
|  | *Haematoxylon brasiletto* | 19.50000 | -105.10000 | Bark PS |
|  | *Heliocarpus pallidus* | 19.50000 | -105.10000 | Bark PS |
|  | *Hernandia albiflora* | -16.10000 | 145.50000 | Bark PS |
|  | *Idiospermum australiense* | -16.10000 | 145.50000 | Bark PS |
|  | *Jacksonia scoparia* | -32.80000 | 150.90000 | Bark PS |
|  | *Jatropha chamelensis* | 19.50000 | -105.10000 | Bark PS |
|  | *Leucopogon ericoides* | -42.40000 | 147.00000 | Bark PS |
|  | *Lophostemon lactifluus* | -12.50000 | 131.10000 | Bark PS |
|  | *Montanoa tomentosa* | 19.30000 | -99.20000 | Bark PS |
|  | *Myristica globosa* | -16.10000 | 145.50000 | Bark PS |
|  | *Persoonia falcata* | -12.50000 | 131.10000 | Bark PS |
|  | *Persoonia juniperina* | -42.40000 | 147.00000 | Bark PS |
|  | *Persoonia linearis* | -32.80000 | 150.90000 | Bark PS |
|  | *Petalostigma pubescens* | -12.50000 | 131.10000 | Bark PS |
|  | *Piptadenia constricta* | 19.50000 | -105.10000 | Bark PS |
|  | *Pittocaulon praecox* | 19.30000 | -99.20000 | Bark PS |
|  | *Planchonia careya* | -12.50000 | 131.10000 | Bark PS |
|  | *Plumeria rubra* | 19.50000 | -105.10000 | Bark PS |
|  | *Podolobium ilicifolium* | -32.80000 | 150.90000 | Bark PS |
|  | *Prostanthera aff. violaceae* | -32.80000 | 150.90000 | Bark PS |
|  | *Pultenaea juniperina* | -42.40000 | 147.00000 | Bark PS |
|  | *Pultenaea scabra* | -32.80000 | 150.90000 | Bark PS |
|  | *Quercus rugosa* | 19.30000 | -99.20000 | Bark PS |
|  | *Rockinghamia angustifolia* | -16.10000 | 145.50000 | Bark PS |
|  | *Sedum oxypetalum* | 19.30000 | -99.20000 | Bark PS |
|  | *Tecoma stans* | 19.30000 | -99.20000 | Bark PS |
|  | *Wigandia urens* | 19.30000 | -99.20000 | Bark PS |
| Rundel et al. (1995) | *Pachypodium namaquanum* | -28.26667 | 18.10000 | Bark PS |
| Saveyn et al. (2010) | *Arctostaphylos manzanita* | 37.87190 | -122.26073 | Bark PS |
|  | *Prunus ilicifolia* | 37.87190 | -122.26073 | Bark PS |
|  | *Umbellularia californica* | 37.87190 | -122.26073 | Bark PS |
| Schaedle and Brayman (1986) | *Populus tremuloides* | 43.04011 | -76.14387 | Bark PS |
| Scott (1907) | *Acer pseudoplatanus* |  |  | Bark PS |
|  | *Aesculus hippocastanum* |  |  | Bark PS |
|  | *Aucuba japonica* |  |  | Bark PS |
|  | *Betula alba* |  |  | Bark PS |
|  | *Carpinus betulus* |  |  | Bark PS |
|  | *Cestrum sp* |  |  | Bark PS |
|  | *Corylus avellana* |  |  | Bark PS |
|  | *Crataegus curvisepala* |  |  | Bark PS |
|  | *Daphne mezereum* |  |  | Bark PS |
|  | *Fagus sylvatica* |  |  | Bark PS |
|  | *Fraxinus excelsior* |  |  | Bark PS |
|  | *Hedera helix* |  |  | Bark PS |
|  | *Ilex aquifolium* |  |  | Bark PS |
|  | *Jasminum nudiflorum* |  |  | Bark PS |
|  | *Laburnum vulgare* |  |  | Bark PS |
|  | *Larix europaea* |  |  | Bark PS |
|  | *Lonicera periclymenum* |  |  | Bark PS |
|  | *Plumbago sp* |  |  | Bark PS |
|  | *Populus nigra* |  |  | Bark PS |
|  | *Prunus spinosa* |  |  | Bark PS |
|  | *Pyrus amygdaliformis* |  |  | Bark PS |
|  | *Quercus robur* |  |  | Bark PS |
|  | *Robinia pseudoacacia* |  |  | Bark PS |
|  | *Rosa canina* |  |  | Bark PS |
|  | *Rubus sp* |  |  | Bark PS |
|  | *Sambucus nigra* |  |  | Bark PS |
|  | *Syringa vulgaris* |  |  | Bark PS |
|  | *Tilia europaea* |  |  | Bark PS |
|  | *Ulmus campestris* |  |  | Bark PS |
|  | *Viburnum lantana* |  |  | Bark PS |
| Simbo et al. (2013) | *Adansonia digitata* | 51.22281 | 4.40804 | Bark PS* |
| Sivapalan (1975) | *Camellia sinensis* | 6.91468 | 80.70361 | Bark PS* |
| Smith and Osmon (1987) | *Eriogonum inflatum* | 37.00000 | -117.35000 | Bark PS + g |
|  | *Eriogonum inflatum* | 38.68333 | -118.78333 | Bark PS + g |
| Solhaug and Haugen (1998) | *Populus tremula* | 59.50000 | 10.78333 | Bark PS |
| Solhaug et al. (1995) | *Populus tremula* | 59.50000 | 10.78333 | Bark PS |
| Strain and Johnson (1963) | *Populus tremuloides* | 41.00000 | -105.50000 | Bark PS* |
| Su et al. (2004) | *Calligonum mongolicum* | 39.31667 | 100.03333 | Bark PS |
|  | *Haloxylon ammodendron* | 39.31667 | 100.03333 | Bark PS |
| Su et al. (2007) | *Haloxylon ammodendron* | 39.31667 | 100.03333 | Bark PS |
| Szarek and Woodhouse (1978) | *Parkinsonia microphylla* | 33.43333 | -111.75000 | Bark PS |
|  | *Parkinsonia microphylla* | 33.43333 | -111.75000 | Bark PS |
| Tarvainen et al. (2014) | *Picea abies* | 58.38334 | 12.15000 | Bark g |
| Tarvainen et al. (2018) | *Pinus sylvestris* | 64.16666 | 19.75000 | Bark PS* |
| Tikhonov et al. (2017) | *Vitis vinifera* | 45.04835 | 38.92109 | Bark PS |
| Ting et al. (1983) | *Cissus quadrangularis* | 33.97371 | -117.33025 | Bark PS |
| Tinoco-Ojanguren (2008) | *Justicia californica* | 29.01667 | -110.95000 | Bark PS |
| Tomasella et al. (2021) | *Populus nigra* | 45.66195 | 13.79294 | Bark PS* |
| Valladares et al. (2003) | *Coronilla juncea* | 40.43665 | -3.63113 | Bark PS |
|  | *Cytisus scoparius* | 40.43665 | -3.63113 | Bark PS |
|  | *Genista scorpius* | 40.43665 | -3.63113 | Bark PS |
|  | *Retama sphaerocarpa* | 40.43665 | -3.63113 | Bark PS* |
|  | *Spartium junceum* | 40.43665 | -3.63113 | Bark PS* |
|  | *Ulex europaeus* | 40.43665 | -3.63113 | Bark PS* |
| Vick and Young (2009) | *Myrtica cerifeca* | 37.66667 | -75.66666 | Bark PS* |
| Wiebe (1975) | *Atriplex contertifolia* | 41.74517 | -111.81193 | Bark PS |
|  | *Betula pendula* | 41.74517 | -111.81193 | Bark PS |
|  | *Gleditschia triacanthos* | 41.74517 | -111.81193 | Bark PS |
|  | *Populus tremuloides* | 41.74517 | -111.81193 | Bark PS |
|  | *Sarcobatus vermiculatus* | 41.74517 | -111.81193 | Bark PS |
|  | *Syringa vulgaris* | 41.74517 | -111.81193 | Bark PS |
|  | *Tilia americana* | 41.74517 | -111.81193 | Bark PS |
| Wiebe et al. (1974) | *Atriplex contertifolia* | 40.72150 | -117.66830 | Bark PS |
|  | *Atriplex contertifolia* | 40.72150 | -117.66830 | Bark PS |
| Wittmann et al. (2001) | *Fagus sylvatica* | 51.46363 | 7.00260 | Bark PS* |
|  | *Populus tremula* | 51.46363 | 7.00260 | Bark PS* |
| Wittmann et al. (2005) | *Betula pendula* | 51.46363 | 7.00260 | Bark PS* |
| Wittmann et al. (2006) | *Betula pendula* | 51.46363 | 7.00260 | Bark PS* + g |
| Wittmann and Pfanz (2007) | *Betula pendula* | 51.46363 | 7.00260 | Bark PS* |
|  | *Fagus sylvatica* | 51.46363 | 7.00260 | Bark PS* |
| Wittmann and Pfanz (2008) | *Alnus glutinosa* | 51.46363 | 7.00260 | Bark PS* |
|  | *Alnus glutinosa* | 51.46363 | 7.00260 | Bark PS* + g |
|  | *Betula pendula* | 51.46363 | 7.00260 | Bark PS* |
|  | *Betula pendula* | 51.46363 | 7.00260 | Bark PS* + g |
|  | *Fagus sylvatica* | 51.46363 | 7.00260 | Bark PS* |
|  | *Fagus sylvatica* | 51.46363 | 7.00260 | Bark PS* + g |
|  | *Prunus avium* | 51.46363 | 7.00260 | Bark PS* |
|  | *Prunus avium* | 51.46363 | 7.00260 | Bark PS* + g |
|  | *Quercus robur* | 51.46363 | 7.00260 | Bark PS* |
|  | *Quercus robur* | 51.46363 | 7.00260 | Bark PS* + g |
| Wittmann and Pfanz (2014) | *Fagus sylvatica* | 51.46363 | 7.00260 | Bark PS* |
|  | *Quercus robur* | 51.46363 | 7.00260 | Bark PS* |
| Wittmann and Pfanz (2016) | *Abies nordmanniana* | 51.46363 | 7.00260 | Bark PS |
|  | *Fagus sylvatica* | 51.46363 | 7.00260 | Bark PS |
|  | *Fraxinus excelsior* | 51.46363 | 7.00260 | Bark PS |
|  | *Prunus avium* | 51.46363 | 7.00260 | Bark PS |
|  | *Quercus robur* | 51.46363 | 7.00260 | Bark PS |
| Wittmann and Pfanz (2018) | *Populus nigra* | 51.46363 | 7.00260 | Bark PS |
| Wolfe (2020) | *Annona hayesii* | 8.99354 | -79.54623 | Bark g |
|  | *Astronium graveolens* | 8.51667 | -79.88333 | Bark g |
|  | *Astronium graveolens* | 8.99354 | -79.54623 | Bark g |
|  | *Bursera simaruba* | 8.51667 | -79.88333 | Bark g |
|  | *Bursera simaruba* | 8.51667 | -79.88333 | Bark g |
|  | *Cavanillesia platanifolia* | 8.99354 | -79.54623 | Bark g |
|  | *Cavanillesia platanifolia* | 8.99354 | -79.54623 | Bark g |
|  | *Cedrela odorata* | 8.99354 | -79.54623 | Bark g |
|  | *Cojoba rufescens* | 8.51667 | -79.88333 | Bark g |
|  | *Cojoba rufescens* | 8.99354 | -79.54623 | Bark g |
|  | *Cojoba rufescens* | 8.51667 | -79.88333 | Bark g |
|  | *Genipa americana* | 8.51667 | -79.88333 | Bark g |
|  | *Genipa americana* | 8.51667 | -79.88333 | Bark g |
|  | *Hymenaea courbaril* | 8.99354 | -79.54623 | Bark g |
| Xu et al. (1997) | *Solanum lycopersicum* | 35.66588 | 140.07286 | Bark PS |
| Xu et al (2007) | *Haloxylon ammodendron* | 44.28333 | 87.93333 | Bark PS |
| Yanykin et al. (2020) | *Vitis vinifera* | 45.04835 | 38.92109 | Bark PS |
| Yiotis et al. (2006) | *Calicotome villosa* | 38.25000 | 21.73333 | Bark PS |
| Yiotis et al. (2008) | *Calicotome villosa* | 38.25000 | 21.73333 | Bark PS |
| Yiotis et al. (2009) | *Elaeagnus angustifolia* | 38.28968 | 21.78491 | Bark PS |
|  | *Nerium oleander* | 38.28968 | 21.78491 | Bark PS |
|  | *Plantanus orientalis* | 38.28968 | 21.78491 | Bark PS |
|  | *Quercus coccifera* | 38.28968 | 21.78491 | Bark PS |
| Yu et al. (2018) | *Eucalyptus dunnii?* | 26.74142 | 115.05811 | Bark PS* |
|  | *Osmanthus fragrans* | 26.74142 | 115.05811 | Bark PS* |
| Yu et al. (2019) | *Salix matsudana* | 40.01072 | 116.21000 | Bark Water Uptake |
| Zheng et al. (2021) | *Mikania micrantha* | 23.14599 | 113.35378 | Bark PS* |
|  | *Paederia scandens* | 23.14599 | 113.35378 | Bark PS* |
|  | *Pharbitis nil* | 23.14599 | 113.35378 | Bark PS* |
|  | *Pueraria montana var lobata* | 23.14599 | 113.35378 | Bark PS* |
| Zhu and Jin (2015) | *Calligonum mongolicum* |  |  | Bark PS |

**References**

Adams MS, Strain BR, Ting IP (1967) Photosynthesis in chlorophyllus stem tissue and leaves of Cercidium floridum: accumulation and distribution of 14C from 14CO2. Plant Physiology 42:1797–1799

Alessio GA, Pietrini F, Brilli F, Loreto F (2005) Characteristics of CO2 exchange between peach stems and the atmosphere. Functional Plant Biology 32:787–795

Anderson DA, Szarek SR (1981) Ecophysiological studies on Sonoran Desert plants, VI. Seasonal photosynthesis and production of Machaeranthera gracilis, a winter ephemera. Plant, Cell & Environment 4:243–250

Armstrong W, Armstrong J (2005) Stem photosynthesis not pressurized ventilation is responsible for light-enhanced oxygen supply to submerged roots of alder (Alnus glutinosa). Annals of Botany 96:591–612. https://doi.org/10.1093/aob/mci213

Aschan G, Wittmann C, Pfanz H (2001) Age-dependent bark photosynthesis of aspen twigs. Trees 15:431–437. https://doi.org/10.1007/s004680100120

Ávila-Lovera E, Tezara W (2018) Water-use efficiency is higher in green stems than in leaves of a tropical tree species. Trees 32:1547–1558. https://doi.org/10.1007/s00468-018-1732-x

Ávila-Lovera E, Zerpa AJ, Santiago LS (2017) Stem photosynthesis and hydraulics are coordinated in desert plant species. New Phytologist 216:1119–1129. https://doi.org/10.1111/nph.14737

Ávila-Lovera E, Haro R, Ezcurra E, Santiago LS (2019) Costs and benefits of photosynthetic stems in desert species from southern California. Functional Plant Biology 46:175–186. https://doi.org/10.1071/FP18203

Ávila-Lovera E, Garcillán PP, Silva‐Bejarano C, Santiago LS (2020) Functional traits of leaves and photosynthetic stems of species from a sarcocaulescent scrub in the southern Baja California Peninsula. American Journal of Botany 107:1410–1422. https://doi.org/10.1002/ajb2.1546

Beikircher, B., & Mayr, S. (2013). Winter peridermal conductance of apple trees: lammas shoots and spring shoots compared. Trees, 27(3), 707-715.

Berveiller D, Damesin C (2008) Carbon assimilation by tree stems: potential involvement of phosphoenolpyruvate carboxylase. Trees 22:149–157. https://doi.org/10.1007/s00468-007-0193-4

Berveiller D, Kierzkowski D, Damesin C (2007) Interspecific variability of stem photosynthesis among tree species. Tree Physiology 27:53–61. https://doi.org/10.1093/treephys/27.1.53

Billings WD, Godfrey PJ (1967) Photosynthetic utilization of internal carbon dioxide by hollow-stemmed plants. Science 158:121–123

Bloemen J, Vergeynst LL, Overlaet-Michiels L, Steppe K (2016) How important is woody tissue photosynthesis in poplar during drought stress? Trees 30:63–72. https://doi.org/10.1007/s00468-014-1132-9

Bossard CC, Rejmanek M (1992) Why have green stems? Functional Ecology 6:197–205. https://doi.org/10.2307/2389755

Brayman AA, Schaedle M (1982) Photosynthesis and respiration of developing Populus tremuloides internodes. Plant Physiology 69:911–915. https://doi.org/10.1104/pp.69.4.911

Burrows GE, Connor C (2020) Chloroplast distribution in the stems of 23 Eucalypt species. Plants 9:1814. https://doi.org/10.3390/plants9121814

Cagnola JI, Ploschuk E, Benech-Arnold T, et al (2012) Stem transcriptome reveals mechanisms to reduce the energetic cost of shade-avoidance responses in tomato. Plant Physiology 160:1110–1119. https://doi.org/10.1104/pp.112.201921

Cannon WA (1908) The topography of the chlorophyll apparatus in desert plants. Carniege Institution of Washington

Carmichael, M. J., White, J. C., Cory, S. T., Berry, Z. C., & Smith, W. K. (2020). Foliar water uptake of fog confers ecophysiological benefits to four common tree species of southeastern freshwater forested wetlands. Ecohydrology, 13(7), e2240.

Cerasoli S, McGuire MA, Faria J, et al (2008) CO2 efflux, CO2 concentration and photosynthetic refixation in stems of Eucalyptus globulus (Labill.). Journal of Experimental Botany 60:99–105. https://doi.org/10.1093/jxb/ern272

Cernusak, L. A., & Hutley, L. B. (2011). Stable isotopes reveal the contribution of corticular photosynthesis to growth in branches of Eucalyptus miniata. Plant physiology, 155(1), 515-523.

Cernusak L, Marshall J (2000) Photosynthetic refixation in branches of western white pine. Functional Ecology 14:300–311. https://doi.org/10.1046/j.1365-2435.2000.00436.x

Cernusak LA, Marshall JD, Comstock JP, Balster NJ (2001) Carbon isotope discrimination in photosynthetic bark. Oecologia 128:24–35. https://doi.org/10.1007/s004420100629

Chen X, Gao J, Zhao P, et al (2018) Tree species with photosynthetic stems have greater nighttime sap flux. Frontiers in Plant Science 9:. https://doi.org/10.3389/fpls.2018.00030

Chen X, Zhao P, Zhao X, et al (2021) Involvement of stem corticular photosynthesis in hydraulic maintenance of *Eucalyptus* trees and its effect on leaf gas exchange. Environmental and Experimental Botany 186:104451. https://doi.org/10.1016/j.envexpbot.2021.104451

Comstock JP, Cooper TA, Ehleringer JR (1988) Seasonal patterns of canopy development and carbon gain in nineteen warm desert shrub species. Oecologia 75:327–335. https://doi.org/10.1007/BF00376933

Comstock JP, Cooper TA, Ehleringer JR (1988) Seasonal patterns of canopy development and carbon gain in nineteen warm desert shrub species. Oecologia 75:327–335. https://doi.org/10.1007/BF00376933

Damesin, C. (2003). Respiration and photosynthesis characteristics of current‐year stems of Fagus sylvatica: from the seasonal pattern to an annual balance. New Phytologist, 158(3), 465-475.

De Baerdemaeker, N. J., Salomón, R. L., De Roo, L., & Steppe, K. (2017). Sugars from woody tissue photosynthesis reduce xylem vulnerability to cavitation. New Phytologist, 216(3), 720-727.

De Roo L, Salomón RL, Steppe K (2020) Woody tissue photosynthesis reduces stem CO2 efflux by half and remains unaffected by drought stress in young Populus tremula trees. Plant, Cell & Environment 43:981–991. https://doi.org/10.1111/pce.13711

De Roo, L., Lauriks, F., Salomón, R. L., Oleksyn, J., & Steppe, K. (2020). Woody tissue photosynthesis increases radial stem growth of young poplar trees under ambient atmospheric CO2 but its contribution ceases under elevated CO2. Tree Physiology, 40(11), 1572-1582.

De Roo, L., Salomón, R. L., Oleksyn, J., & Steppe, K. (2020). Woody tissue photosynthesis delays drought stress in Populus tremula trees and maintains starch reserves in branch xylem tissues. New Phytologist.

DePuit EJ, Caldwell MM (1975) Stem and leaf gas exchange of two arid land shrubs. American Journal of Botany 62:954–961. https://doi.org/10.2307/2441640

Dima E, Manetas Y, Psaras GK (2006) Chlorophyll distribution pattern in inner stem tissues: evidence from epifluorescence microscopy and reflectance measurements in 20 woody species. Trees 20:515–521. https://doi.org/10.1007/s00468-006-0067-1

Mason Earles, J., Sperling, O., Silva, L. C., McElrone, A. J., Brodersen, C. R., North, M. P., & Zwieniecki, M. A. (2016). Bark water uptake promotes localized hydraulic recovery in coastal redwood crown. Plant, cell & environment, 39(2), 320-328.

Edwards, E. J., & Donoghue, M. J. (2006). Pereskia and the origin of the cactus life-form. The American Naturalist, 167(6), 777-793.

Ehleringer JR, Comstock JP, Cooper TA (1987) Leaf-twig carbon isotope ratio differences in photosynthetic-twig desert shrubs. Oecologia 71:318–320

Ehleringer JR, Cooper TA (1992) On the role of orientation in reducing photoinhibitory damage in photosynthetic-twig desert shrubs. Plant, Cell & Environment 15:301–306

Eyles A, Pinkard EA, O’grady AP, et al (2009) Role of corticular photosynthesis following defoliation in Eucalyptus globulus. Plant, Cell & Environment 32:1004–1014. https://doi.org/10.1111/j.1365-3040.2009.01984.x

Fan B, Zhao C, Zhang X, Sun K (2018) Impacts of sand burial and wind erosion on regeneration and growth of a desert clonal shrub. Frontiers in Plant Science 9:1696. https://doi.org/10.3389/fpls.2018.01696

Filippou M, Fasseas C, Karabourniotis G (2007) Photosynthetic characteristics of olive tree (Olea europaea) bark. Tree Physiology 27:977–984

Foote KC, Schaedle M (1976) Diurnal and seasonal patterns of photosynthesis and respiration by stems of Populus tremuloides michx. Plant Physiology 58:651–655

Francino DMT, Sant’anna-Santos BF, Silva KLF, et al (2006) Anatomia foliar e caulinar de Chamaecrista trichopoda (Caesalpinioideae) e histoquímica do nectário extrafloral. Planta Daninha 24:695–705

Franco-Vizcaíno E, Goldstein G, Ting IP (1990) Comparative gas exchange of leaves and bark in three stem succulents of Baja California. American Journal of Botany 77:1272–1278. https://doi.org/10.2307/2444588

Gao J, Zhou J, Sun Z, et al (2015) Suppression of nighttime sap flux with lower stem photosynthesis in Eucalyptus trees. International Journal of Biometeorology 1–12. https://doi.org/10.1007/s00484-015-1050-6

Gibson AC (1981) Vegetative anatomy of Pachycormus (Anacardiaceae). Botanical Journal of the Linnean Society 83:273–284. https://doi.org/10.1111/j.1095-8339.1981.tb00351.x

Gibson AC (1983) Anatomy of photosynthetic old stems of nonsucculent dicotyledons from North American deserts. Botanical Gazette 144:347–362. https://doi.org/10.1086/337383

Girma A, Skidmore AK, de Bie CAJM, et al (2013) Photosynthetic bark: Use of chlorophyll absorption continuum index to estimate Boswellia papyrifera bark chlorophyll content. International Journal of Applied Earth Observation and Geoinformation 23:71–80. https://doi.org/10.1016/j.jag.2012.10.013

Glass JC, Granet K (1978) Bark chlorophyll in the American beech (Fagus grandifolia) varies with bark aspect. American Midland Naturalist 100:510. https://doi.org/10.2307/2424858

Gómez-Vazquez BG, Mark Engleman E (1984) Bark anatomy of <i>Bursera longipes<is> (Rose) Standley and Bursera copallifera (Sessé & Moc.) Bullock. IAWA J 5:335–340. https://doi.org/10.1163/22941932-90000423

Grašič M, Malkoč H, Gaberščik A (2020) Corylus avellana bark optical properties differ during and out of the vegetation season. Acta Biologica Slovenica 63:3–17

Haase P, Pugnaire FI, Clark SC, Incoll LD (1999) Diurnal and seasonal changes in cladode photosynthetic rate in relation to canopy age structure in the leguminous shrub Retama sphaerocarpa. Functional Ecology 13:640–649

Henrickson J (1969) Anatomy of periderm and cortex of Fouquieriaceae. aliso 7:97–126. https://doi.org/10.5642/aliso.19690701.07

Hu Y-Y, Zhang Y-L, Luo H-H, et al (2012) Important photosynthetic contribution from the non-foliar green organs in cotton at the late growth stage. Planta 235:325–336. https://doi.org/10.1007/s00425-011-1511-z

Ivanov LA, Ivanova LA, Ronzhina DA, et al (2004) Structural and functional grounds for Ephedra sinica expansion in mongolian steppe ecosystems. Russian Journal of Plant Physiology 51:469–475. https://doi.org/10.1023/B:RUPP.0000035738.89102.fc

Katz, C., Oren, R., Schulze, E. D., & Milburn, J. A. (1989). Uptake of water and solutes through twigs of Picea abies (L.) Karst. Trees, 3(1), 33-37.

Kharouk VI, Middleton EM, Spencer SL, et al (1995) Aspen bark photosynthesis and its significance to remote sensing and carbon budget estimates in the boreal ecosystem. Water, Air, and Soil Pollution 82:483–497. https://doi.org/10.1007/BF01182858

Kocurek M, Kornas A, Wierzchnicki R, et al (2020) Importance of stem photosynthesis in plant carbon allocation of Clusia minor. Trees. https://doi.org/10.1007/s00468-020-01977-w

Kocurek M, Kornas A, Pilarski J, et al (2015) Photosynthetic activity of stems in two Clusia species. Trees 29:1029–1040. https://doi.org/10.1007/s00468-015-1182-7

Laur, J., & Hacke, U. G. (2014). Exploring Picea glauca aquaporins in the context of needle water uptake and xylem refilling. New Phytologist, 203(2), 388-400.

Levizou E, Manetas Y (2008) Maximum and effective PSII yields in the cortex of the main stem of young Prunus cerasus trees: effects of seasons and exposure. Trees 22:159–164. https://doi.org/10.1007/s00468-007-0195-2

Levy PE, Jarvis PG (1998) Stem CO2 fluxes in two Sahelian shrub species (Guiera senegalensis and Combretum micranthum). Functional Ecology 12:107–116. https://doi.org/10.1046/j.1365-2435.1998.00156.x

Li L, Li X, Xu X, et al (2014) Photosystem II activity in the leaves and assimilative branches of Alhagi sparsifolia Shap. under brief elevated temperature. Acta Physiologiae Plantarum 36:1919–1926. https://doi.org/10.1007/s11738-014-1567-z

Liu, S. (1998). Estimation of rainfall storage capacity in the canopies of cypress wetlands and slash pine uplands in North-Central Florida. Journal of Hydrology, 207(1-2), 32-41.

Liu J, Gu L, Yu Y, et al (2018) Stem photosynthesis of twig and its contribution to new organ development in cutting seedlings of Salix matsudana koidz. Forests 9:207. https://doi.org/10.3390/f9040207

Liu, J., Gu, L., Yu, Y., Huang, P., Wu, Z., Zhang, Q., ... & Sun, Z. (2019). Corticular photosynthesis drives bark water uptake to refill embolized vessels in dehydrated branches of Salix matsudana. Plant, cell & environment, 42(9), 2584-2596.

Lyshede OB (1979) Xeromorphic features of three stem assimilants in relation to their ecology. Botanical Journal of the Linnean Society 78:85–98. https://doi.org/10.1111/j.1095-8339.1979.tb02187.x

Maina JN, Wang Q (2015) Seasonal Response of Chlorophyll a / b Ratio to Stress in a Typical Desert Species: Haloxylon ammodendron. Arid Land Research and Management 29:321–334. https://doi.org/10.1080/15324982.2014.980588

Manetas Y (2004) Probing corticular photosynthesis through in vivo chlorophyll fluorescence measurements: evidence that high internal CO2 levels suppress electron flow and increase the risk of photoinhibition. Physiologia Plantarum 120:509–517. https://doi.org/10.1111/j.0031-9317.2004.00256.x

Manetas Y, Pfanz H (2005) Spatial heterogeneity of light penetration through periderm and lenticels and concomitant patchy acclimation of corticular photosynthesis. Trees 19:409–414. https://doi.org/10.1007/s00468-004-0399-7

Mayr, S., Schmid, P., Laur, J., Rosner, S., Charra-Vaskou, K., Dämon, B., & Hacke, U. G. (2014). Uptake of water via branches helps timberline conifers refill embolized xylem in late winter. Plant Physiology, 164(4), 1731-1740.

Mincke J, Courtyn J, Vanhove C, et al (2020) Studying in vivo dynamics of xylem-transported 11CO2 using positron emission tomography. Tree Physiology 40:1058–1070. https://doi.org/10.1093/treephys/tpaa048

Mooney HA, Strain BR (1964) Bark photosynthesis in Ocotillo. Madroño 17:230–233

Muller CH (1941) The holocanthoid plants of North America. Madroño 6:128–132

Nedoff JA, Ting IP, Lord EM (1985) Structure and function of the green stem tissue in ocotillo (Fouquieria splendens). American Journal of Botany 72:143–151. https://doi.org/10.1002/j.1537-2197.1985.tb05352.x

Nilsen ET (1992) The influence of water stress on leaf and stem photosynthesis in Spartium junceum L. Plant, Cell & Environment 15:455–461. https://doi.org/10.1111/j.1365-3040.1992.tb00996.x

Nilsen ET, Bao Y (1990) The influence of water stress on stem and leaf photosynthesis in Glycine max and Sparteum junceum (Leguminosae). American Journal of Botany 77:1007–1015. https://doi.org/10.2307/2444572

Nilsen ET, Sharifi MR (1994) Seasonal acclimation of stem photosynthesis in woody legume species from the Mojave and Sonoran deserts of California. Plant Physiology 105:1385–1391

Nilsen ET, Meinzer FC, Rundel PW (1989) Stem photosynthesis in Psorothamnus spinosus (smoke tree) in the Sonoran Desert of California. Oecologia 79:193–197

Nilsen ET, Sharifi MR, Rundel PW, et al (1990) Water relations of stem succulent trees in north-central Baja California. Oecologia 82:299–303. https://doi.org/10.1007/BF00317474

Nilsen ET, Karpa D, Mooney HA, Field C (1993) Patterns of stem photosynthesis in two invasive legumes (Spartium junceum, <i>Cytisus scoparius</i) of the California coastal region. American Journal of Botany 80:1126–1136. https://doi.org/10.2307/2445540

Nilsen ET, Rundel PW, Sharifi MR (1996) Diurnal gas exchange characteristics of two stem photosynthesizing legumes in relation to the climate at two contrasting sites in the California desert. Flora 191:105–116

Olson ME (2003) Stem and leaf anatomy of the arborescent Cucurbitaceae Dendrosicyos socotrana with comments on the evolution of pachycauls from lianas. Plant Systematics and Evolution 239:199–214. https://doi.org/10.1007/s00606-003-0006-1

Osmond CB, Smith SD, Gui-Ying B, Sharkey TD (1987) Stem photosynthesis in a desert ephemeral, Eriogonum inflatum. Characterization of leaf and stem CO2 fixation and H2O vapor exchange under controlled conditions. Oecologia 72:542–549. https://doi.org/doi.org/10.1007/BF00378980

Pearson LC, Lawrence DB (1958) Photosynthesis in aspen bark. American Journal of Botany 45:383–387. https://doi.org/10.1002/j.1537-2197.1958.tb13141.x

Pfanz H (1999) Photosynthetic performance of twigs and stems of trees with and without stress. Phython (Austria) 39:29–34

Pfanz H, Aschan G (2001) The existence of bark and stem photosynthesis in woody plants and its significance for the overall carbon gain. an eco-physiological and ecological approach. In: Esser K, Lüttge U, Kadereit JW, Beyschlag W (eds) Progress in Botany: Genetics Physiology Systematics Ecology. Springer Berlin Heidelberg, Berlin, Heidelberg, pp 477–510

Pfanz H, Aschan G, Langenfeld-Heyser R, et al (2002) Ecology and ecophysiology of tree stems: corticular and wood photosynthesis. Naturwissenschaften 89:147–162. https://doi.org/10.1007/s00114-002-0309-z

Pilarski J (2002) Diurnal and seasonal changes in the intensity of photosynthesis in stems of lilac (Syringa vulgaris L.). Acta Physiologiae Plantarum 24:29–36. https://doi.org/10.1007/s11738-002-0018-4

Pivovaroff AL, Pasquini SC, De Guzman ME, et al (2016) Multiple strategies for drought survival among woody plant species. Functional Ecology 30:517–526. https://doi.org/10.1111/1365-2435.12518

Pivovaroff A, Sharifi R, Scoffoni C, et al (2014) Making the best of the worst of times: traits underlying combined shade and drought tolerance of <i>Ruscus aculeatus<i> and <i>Ruscus microglossum<i> (Asparagaceae). Functional Plant Biology 41:11–24. https://doi.org/10.1071/FP13047

Ranjan S, Singh R, Soni DK, et al (2012) Photosynthetic performance of Jatropha curcas fruits. Plant Physiology and Biochemistry 52:66–76. https://doi.org/10.1016/j.plaphy.2011.11.008

Rentzou A, Psaras GK (2008) Green plastids, maximal PSII photochemical efficiency and starch content of inner stem tissues of three Mediterranean woody species during the year. Flora 203:350–357. https://doi.org/10.1016/j.flora.2007.04.009

Rosell JA, Castorena M, Laws CA, Westoby M (2015) Bark ecology of twigs vs. main stems: functional traits across eighty-five species of angiosperms. Oecologia 178:1033–1043. https://doi.org/10.1007/s00442-015-3307-5

Rundel PW, Cowling RM, Esler KJ, et al (1995) Winter growth phenology and leaf orientation in Pachypodium namaquanum (Apocynaceae) in the succulent karoo of the Richtersveld, South Africa. Oecologia 101:472–477. https://doi.org/10.1007/BF00329426

Saveyn A, Steppe K, Ubierna N, Dawson TE (2010) Woody tissue photosynthesis and its contribution to trunk growth and bud development in young plants. Plant, Cell & Environment 33:1949–1958. https://doi.org/10.1111/j.1365-3040.2010.02197.x

Schaedle M, Brayman AA (1986) Ribulose-1, 5-bisphosphate carboxylase activity of Populus tremuloides Michx. bark tissues. Tree Physiology 1:53–56

Scott DG (1907) On the distribution of chlorophyll in the young shoots of woody plants. Annals of Botany 21:437–439. https://doi.org/10.1093/oxfordjournals.aob.a089146

Simbo DJ, Van den Bilcke N, Samson R (2013) Contribution of corticular photosynthesis to bud development in African baobab (Adansonia digitata L.) and Castor bean (Ricinus communis L.) seedlings. Environmental and Experimental Botany 95:1–5. https://doi.org/10.1016/j.envexpbot.2013.07.002

Sivapalan K (1975) Photosynthetic assimilation of ¹⁴CO₂ by mature brown stems of the tea plant (Camellia sinensis L.). Annals of Botany 39:137–140

Smith SD, Osmond CB (1987) Stem photosynthesis in a desert ephemeral, Eriogonum inflatum. Morphology, stomatal conductance and water-use efficiency in field populations. Oecologia 72:533–541

Solhaug KA, Haugen J (1998) Seasonal variation of photoinhibition of photosynthesis in bark from Populus tremula L. Photosynthetica 35:411–417. https://doi.org/10.1023/A:1006968403331

Solhaug, K. A., Gauslaa, Y., & Haugen, J. (1995). Adverse effects of epiphytic crustose lichens upon stem photosynthesis and chlorophyll of Populus tremula L. Botanica Acta, 108(3), 233-239.

Strain BR, Johnson PL (1963) Corticular photosynthesis and growth in Populus tremuloides. Ecology 44:581–584. https://doi.org/10.2307/1932541

Su P-X, Liu X-M, Zhang L-X, et al (2004) Comparison of δ13C values and gas exchange of assimilating shoots of desert plants Haloxylon ammodendron and Calligonum mongolicum with other plants. Israel Journal of Plant Sciences 52:87–97. https://doi.org/10.1560/2CCM-K5A6-WFWQ-K5CU

Su P, Cheng G, Yan Q, Liu X (2007) Photosynthetic regulation of C4 desert plant Haloxylon ammodendron under drought stress. Plant Growth Regulation 51:139–147. https://doi.org/10.1007/s10725-006-9156-9

Szarek SR, Woodhouse RM (1978) Ecophysiological studies of Sonoran Desert plants. IV. Seasonal photosynthetic capacities of Acacia greggii and Cercidium microphyllum. Oecologia 37:221–229

Tarvainen, L., Räntfors, M., & Wallin, G. (2014). Vertical gradients and seasonal variation in stem CO2 efflux within a Norway spruce stand. Tree physiology, 34(5), 488-502.

Tarvainen L, Wallin G, Lim H, et al (2018) Photosynthetic refixation varies along the stem and reduces CO2 efflux in mature boreal Pinus sylvestris trees. Tree Physiology 38:558–569. https://doi.org/10.1093/treephys/tpx130

Tikhonov KG, Khristin MS, Klimov VV, et al (2017) Structural and functional characteristics of photosynthetic apparatus of chlorophyll-containing grape vine tissue. Russian Journal of Plant Physiology 64:73–82. https://doi.org/10.1134/S102144371606011X

Ting IP, Sternberg LO, Deniro MJ (1983) Variable photosynthetic metabolism in leaves and stems of Cissus quadrangularis L. Plant Physiology 71:677–679. https://doi.org/10.1104/pp.71.3.677

Tinoco-Ojanguren C (2008) Diurnal and seasonal patterns of gas exchange and carbon gain contribution of leaves and stems of Justicia californica in the Sonoran Desert. Journal of Arid Environments 72:127–140. https://doi.org/10.1016/j.jaridenv.2007.06.004

Tomasella M, Casolo V, Natale S, et al. (2021) Shade-induced reduction of stem non-structural carbohydrates increases xylem vulnerability to embolism and impedes hydraulic recovery in Populus nigra. New Phytologist n/a: https://doi.org/10.1111/nph.17384

Valladares F, Hernández LG, Dobarro I, et al (2003) The ratio of leaf to total photosynthetic area influences shade survival and plastic response to light of green‐stemmed leguminous shrub seedlings. Annals of Botany 91:577–584. https://doi.org/10.1093/aob/mcg059

Vick JK, Young DR (2009) Corticular photosynthesis: A mechanism to enhance shrub expansion in coastal environments. Photosynthetica 47:26–32. https://doi.org/10.1007/s11099-009-0006-7

Wiebe HH (1975) Photosynthesis in wood. Physiologia Plantarum 33:245–246. https://doi.org/10.1111/j.1399-3054.1975.tb03162.x

Wiebe HH, Al-Saadi HA, Kimball SL (1974) Photosynthesis in the anomalous secondary wood of Atriplex confertifolia stems. American Journal of Botany 61:444–448. https://doi.org/10.2307/2442014

Wittmann C, Pfanz H, Pietrini F (2005) Light-modulation of corticular CO2-refixation in young birch stems (Betula pendula Roth.). Phyton (Austria) 45:195–212

Wittmann C, Pfanz H, Loreto F, et al (2006) Stem CO2 release under illumination: corticular photosynthesis, photorespiration or inhibition of mitochondrial respiration? Plant, Cell & Environment 29:1149–1158. https://doi.org/10.1111/j.1365-3040.2006.01495.x

Wittmann C, Pfanz H (2007) Temperature dependency of bark photosynthesis in beech (Fagus sylvatica L.) and birch (Betula pendula Roth.) trees. Journal of Experimental Botany 58:4293–4306. https://doi.org/10.1093/jxb/erm313

Wittmann C, Pfanz H (2008) General trait relationships in stems: a study on the performance and interrelationships of several functional and structural parameters involved in corticular photosynthesis. Physiologia Plantarum 134:636–648. https://doi.org/10.1111/j.1399-3054.2008.01165.x

Wittmann C, Pfanz H (2014) Bark and woody tissue photosynthesis: a means to avoid hypoxia or anoxia in developing stem tissues. Functional Plant Biology 41:940. https://doi.org/10.1071/FP14046

Wittmann C, Pfanz H (2016) The optical, absorptive and chlorophyll fluorescence properties of young stems of five woody species. Environmental and Experimental Botany 121:83–93. https://doi.org/10.1016/j.envexpbot.2015.05.007

Wittmann C, Pfanz H (2018) More than just CO2‐recycling: corticular photosynthesis as a mechanism to reduce the risk of an energy crisis induced by low oxygen. New Phytologist 219:551–564. https://doi.org/10.1111/nph.15198

Wittmann C, Aschan G, Pfanz H (2001) Leaf and twig photosynthesis of young beech (Fagus sylvatica) and aspen (Populus tremula) trees grown under different light regime. Basic and Applied Ecology 2:145–154. https://doi.org/10.1078/1439-1791-00047

Wolfe BT. 2020 Bark water vapour conductance is associated with drought performance in tropical trees. Biol. Lett. 16: 20200267

Xu H-L, Gauthier L, Desjardins Y, Gosselin A (1997) Photosynthesis in leaves, fruits, stem and petioles of greenhouse-grown tomato plants. Photosynthetica 33:113–123. https://doi.org/10.1023/A:1022135507700

Xu H, Li Y, Xu G, Zou T (2007) Ecophysiological response and morphological adjustment of two Central Asian desert shrubs towards variation in summer precipitation. Plant, Cell & Environment 30:399–409. https://doi.org/10.1111/j.1365-3040.2006.001626.x

Yanykin D, Sundyreva M, Khorobrykh A, et al (2020) Functional characterization of the corticular photosynthetic apparatus in grapevine. Biochimica et Biophysica Acta 1861:148260. https://doi.org/10.1016/j.bbabio.2020.148260

Yiotis C, Manetas Y, Psaras GK (2006) Leaf and green stem anatomy of the drought deciduous Mediterranean shrub Calicotome villosa (Poiret) Link. (Leguminosae). Flora - Morphology, Distribution, Functional Ecology of Plants 201:102–107. https://doi.org/10.1016/j.flora.2005.04.007

Yiotis C, Psaras GK, Manetas Y (2008) Seasonal photosynthetic changes in the green-stemmed Mediterranean shrub Calicotome villosa: a comparison with leaves. Photosynthetica 46:262–267

Yiotis C, Petropoulou Y, Manetas Y (2009) Evidence for light-independent and steeply decreasing PSII efficiency along twig depth in four tree species. Photosynthetica 47:223–231

Yu H, Shang H, Cao J, Chen Z (2018) How important is woody tissue photosynthesis in EuCahetus dunnii Maiden and Osmanthus fragrans (Thunb.) Lour. under O3 stress? Environmental Science and Pollution Research 25:2112–2120. https://doi.org/10.1007/s11356-017-0584-z

Yu, Y. C., Liu, J. X., & Sun, Z. Y. (2019). Transcriptome profiling in Salix matsudana during refilling xylem vessels after embolism. Biol. Plant, 63, 425-431.

Zheng J, Zhang T-J, Li B-H, et al (2021) Strong response of stem photosynthesis to defoliation in Mikania micrantha highlights the contribution of phenotypic plasticity to plant invasiveness. Frontiers in Plant Science 12:15

Zhu J-J, Jin Z-Z (2015) Effect of artificial rejuvenation on leaf growth of Calligonum arborescens. In: Energy and Mechanical Engineering. WORLD SCIENTIFIC, pp 3–10
